# Supplementary material
Source: PubMed Central journal article supplement (PMC3070925)
Supplement: NIHMS260413-supplement-Supllementary_Data.pdf [file NIHMS260413-supplement-Supllementary_Data.pdf]

**Table S1. Fold change between *Nfkb1*<sup>-/-</sup>*Ii10*<sup>-/-</sup> and *Ii10*<sup>-/-</sup> BMDM for all 216 probe sets induced at least 4-fold by LPS.**

| Affy ID      | Symbol    | Name                                                          | FC     | p    |
|--------------|-----------|---------------------------------------------------------------|--------|------|
| 1420549_at   | Gbp1      | guanylate nucleotide binding protein 1                        | 182.13 | 0.00 |
| 1419043_a_at | ligp1     | interferon inducible GTPase 1                                 | 19.01  | 0.01 |
| 1421008_at   | Rsad2     | radical S-adenosyl methionine domain containing 2             | 14.27  | 0.00 |
| 1451905_a_at | Mx1       | myxovirus (influenza virus) resistance 1                      | 14.03  | 0.01 |
| 1424339_at   | Oasl1     | 2'-5' oligoadenylate synthetase-like 1                        | 13.77  | 0.00 |
| 1419042_at   | ligp1     | interferon inducible GTPase 1                                 | 13.01  | 0.01 |
| 1422095_a_at | Tyki      | thymidylate kinase family LPS-inducible member                | 12.68  | 0.01 |
| 1449009_at   | Tgtp      | T-cell specific GTPase                                        | 12.30  | 0.01 |
| 1418612_at   | Slfn1     | schlafen 1                                                    | 12.23  | 0.02 |
| 1418293_at   | lfit2     | interferon-induced protein with tetratricopeptide repeats 2   | 10.68  | 0.01 |
| 1435331_at   | AI447904  | expressed sequence AI447904                                   | 10.44  | 0.02 |
| 1421009_at   | Rsad2     | radical S-adenosyl methionine domain containing 2             | 10.40  | 0.00 |
| 1438676_at   | Mpa2l     | macrophage activation 2 like                                  | 10.36  | 0.00 |
| 1449497_at   | Il12b     | interleukin 12b                                               | 10.21  | 0.00 |
| 1418191_at   | Usp18     | ubiquitin specific peptidase 18                               | 9.97   | 0.01 |
| 1450484_a_at | Tyki      | thymidylate kinase family LPS-inducible member                | 9.67   | 0.00 |
| 1419530_at   | Il12b     | interleukin 12b                                               | 9.13   | 0.00 |
| 1417679_at   | Gfi1      | growth factor independent 1                                   | 8.50   | 0.00 |
| 1418219_at   | Il15      | interleukin 15                                                | 7.25   | 0.00 |
| 1451050_at   | Nt5c3     | 5'-nucleotidase, cytosolic III                                | 7.01   | 0.00 |
| 1419676_at   | Mx2       | myxovirus (influenza virus) resistance 2                      | 6.90   | 0.00 |
| 1431591_s_at | LOC677168 | hypothetical protein LOC677168                                | 6.87   | 0.01 |
| 1428027_at   | NA        | NA                                                            | 6.62   | 0.00 |
| 1438716_at   | AI451617  | expressed sequence AI451617                                   | 6.33   | 0.00 |
| 1417793_at   | ligp2     | interferon inducible GTPase 2                                 | 6.30   | 0.00 |
| 1418930_at   | Cxcl10    | chemokine (C-X-C motif) ligand 10                             | 6.06   | 0.00 |
| 1451537_at   | Chi3l1    | chitinase 3-like 1                                            | 5.82   | 0.00 |
| 1418652_at   | Cxcl9     | chemokine (C-X-C motif) ligand 9                              | 5.76   | 0.01 |
| 1430005_a_at | Batf2     | basic leucine zipper transcription factor, ATF-like 2         | 5.49   | 0.00 |
| 1425806_a_at | Surb7     | SRB7 (suppressor of RNA polymerase B) homolog (S. cerevisiae) | 5.38   | 0.00 |
| 1450783_at   | lfit1     | interferon-induced protein with tetratricopeptide repeats 1   | 5.16   | 0.01 |
| 1450297_at   | Il6       | interleukin 6                                                 | 5.02   | 0.00 |
| 1419026_at   | Daxx      | Fas death domain-associated protein                           | 4.93   | 0.00 |
| 1453939_x_at | LOC677168 | hypothetical protein LOC677168                                | 4.84   | 0.00 |
| 1417292_at   | lfi47     | interferon gamma inducible protein 47                         | 4.83   | 0.01 |
| 1449227_at   | Ch25h     | cholesterol 25-hydroxylase                                    | 4.83   | 0.00 |
| 1417141_at   | lgtp      | interferon gamma induced GTPase                               | 4.72   | 0.00 |
| 1436058_at   | Rsad2     | radical S-adenosyl methionine domain containing 2             | 4.60   | 0.01 |
| 1425156_at   | Gbp6      | guanylate binding protein 6                                   | 4.55   | 0.00 |
| 1425394_at   | BC023105  | cDNA sequence BC023105                                        | 4.50   | 0.00 |
| 1450403_at   | Stat2     | signal transducer and activator of transcription 2            | 4.46   | 0.01 |
| 1419697_at   | Cxcl11    | chemokine (C-X-C motif) ligand 11                             | 4.38   | 0.07 |
| 1450173_at   | Ripk2     | receptor (TNFRSF)-interacting serine-threonine kinase 2       | 4.22   | 0.00 |
| 1448940_at   | Trim21    | tripartite motif protein 21                                   | 4.19   | 0.00 |
| 1419149_at   | Serpine1  | serine (or cysteine) peptidase inhibitor, clade E, member 1   | 4.11   | 0.00 |
| 1450788_at   | Saa1      | serum amyloid A 1                                             | 4.10   | 0.00 |
| 1449450_at   | Ptges     | prostaglandin E synthase                                      | 4.08   | 0.00 |
| 1418317_at   | Lhx2      | LIM homeobox protein 2                                        | 3.99   | 0.01 |
| 1421679_a_at | Cdkn1a    | cyclin-dependent kinase inhibitor 1A (P21)                    | 3.97   | 0.00 |
| 1450446_a_at | Socs1     | suppressor of cytokine signaling 1                            | 3.97   | 0.01 |
| 1421911_at   | Stat2     | signal transducer and activator of transcription 2            | 3.88   | 0.00 |
| 1418077_at   | Trim21    | tripartite motif protein 21                                   | 3.85   | 0.00 |

|              |               |                                                                                    |      |      |
|--------------|---------------|------------------------------------------------------------------------------------|------|------|
| 1421473_at   | Il1a          | interleukin 1 alpha                                                                | 3.82 | 0.00 |
| 1419604_at   | Zbp1          | Z-DNA binding protein 1                                                            | 3.73 | 0.02 |
| 1419858_at   | lfi203        | interferon activated gene 203                                                      | 3.69 | 0.00 |
| 1450639_at   | Slc28a2       | solute carrier family 28 (sodium-coupled nucleoside transporter), member 2         | 3.66 | 0.01 |
| 1451340_at   | Arid5a        | AT rich interactive domain 5A (Mrf1 like)                                          | 3.58 | 0.00 |
| 1451567_a_at | lfi203        | interferon activated gene 203                                                      | 3.53 | 0.01 |
| 1436899_at   | 2700019D07Rik | RIKEN cDNA 2700019D07 gene                                                         | 3.43 | 0.00 |
| 1449449_at   | Ptges         | prostaglandin E synthase                                                           | 3.43 | 0.00 |
| 1452178_at   | Plec1         | plectin 1                                                                          | 3.34 | 0.00 |
| 1435454_a_at | BC006779      | cDNA sequence BC006779                                                             | 3.34 | 0.01 |
| 1427736_a_at | Ccr12         | chemokine (C-C motif) receptor-like 2                                              | 3.32 | 0.00 |
| 1434372_at   | AW112010      | expressed sequence AW112010                                                        | 3.07 | 0.05 |
| 1421236_at   | Ripk2         | receptor (TNFRSF)-interacting serine-threonine kinase 2                            | 2.99 | 0.00 |
| 1424698_s_at | Gca           | grancalcin                                                                         | 2.97 | 0.00 |
| 1449028_at   | Rhou          | ras homolog gene family, member U                                                  | 2.95 | 0.00 |
| 1418392_a_at | Gbp3          | guanylate nucleotide binding protein 3                                             | 2.94 | 0.00 |
| 1426276_at   | lfih1         | interferon induced with helicase C domain 1                                        | 2.89 | 0.00 |
| 1419282_at   | Ccl12         | chemokine (C-C motif) ligand 12                                                    | 2.85 | 0.09 |
| 1434380_at   | Gbp6          | guanylate binding protein 6                                                        | 2.83 | 0.00 |
| 1424638_at   | Cdkn1a        | cyclin-dependent kinase inhibitor 1A (P21)                                         | 2.82 | 0.00 |
| 1448436_a_at | lrf1          | interferon regulatory factor 1                                                     | 2.81 | 0.00 |
| 1460415_a_at | Cd40          | CD40 antigen                                                                       | 2.78 | 0.00 |
| 1449473_s_at | Cd40          | CD40 antigen                                                                       | 2.77 | 0.00 |
| 1429527_a_at | Plscr1        | phospholipid scramblase 1                                                          | 2.76 | 0.00 |
| 1420499_at   | Gch1          | GTP cyclohydrolase 1                                                               | 2.73 | 0.00 |
| 1453181_x_at | Plscr1        | phospholipid scramblase 1                                                          | 2.70 | 0.00 |
| 1436172_at   | Samd9l        | sterile alpha motif domain containing 9-like                                       | 2.52 | 0.02 |
| 1450672_a_at | Trex1         | three prime repair exonuclease 1                                                   | 2.48 | 0.02 |
| 1419721_at   | Gpr109a       | G protein-coupled receptor 109A                                                    | 2.46 | 0.01 |
| 1417262_at   | Ptgs2         | prostaglandin-endoperoxide synthase 2                                              | 2.33 | 0.00 |
| 1449027_at   | Rhou          | ras homolog gene family, member U                                                  | 2.27 | 0.01 |
| 1419714_at   | Cd274         | CD274 antigen                                                                      | 2.26 | 0.00 |
| 1417851_at   | Cxcl13        | chemokine (C-X-C motif) ligand 13                                                  | 2.26 | 0.34 |
| 1455393_at   | Cp            | ceruloplasmin                                                                      | 2.25 | 0.09 |
| 1443414_at   | C78513        | EST C78513                                                                         | 2.22 | 0.00 |
| 1450829_at   | Tnfaip3       | tumor necrosis factor, alpha-induced protein 3                                     | 2.17 | 0.00 |
| 1427932_s_at | 1200016E24Rik | RIKEN cDNA 1200016E24 gene                                                         | 2.16 | 0.00 |
| 1419075_s_at | Saa2          | serum amyloid A 2                                                                  | 2.10 | 0.00 |
| 1417371_at   | Peli1         | pellino 1                                                                          | 2.01 | 0.00 |
| 1422924_at   | Tnfsf9        | tumor necrosis factor (ligand) superfamily, member 9                               | 2.00 | 0.00 |
| 1454070_a_at | Dhdh1         | DDHD domain containing 1                                                           | 1.94 | 0.01 |
| 1425570_at   | Slamf1        | signaling lymphocytic activation molecule family member 1                          | 1.94 | 0.00 |
| 1417495_x_at | Cp            | ceruloplasmin                                                                      | 1.93 | 0.14 |
| 1419607_at   | Tnf           | tumor necrosis factor                                                              | 1.91 | 0.00 |
| 1420380_at   | Ccl2          | chemokine (C-C motif) ligand 2                                                     | 1.91 | 0.01 |
| 1418992_at   | F10           | coagulation factor X                                                               | 1.91 | 0.10 |
| 1418535_at   | Rgl1          | ral guanine nucleotide dissociation stimulator,-like 1                             | 1.89 | 0.00 |
| 1417494_a_at | Cp            | ceruloplasmin                                                                      | 1.86 | 0.09 |
| 1424067_at   | Icam1         | intercellular adhesion molecule                                                    | 1.86 | 0.00 |
| 1448734_at   | Cp            | ceruloplasmin                                                                      | 1.84 | 0.19 |
| 1450698_at   | Dusp2         | dual specificity phosphatase 2                                                     | 1.84 | 0.01 |
| 1423006_at   | Pim1          | proviral integration site 1                                                        | 1.82 | 0.03 |
| 1448728_a_at | Nfkbiz        | nuclear factor of kappa light polypeptide gene enhancer in B-cells inhibitor, zeta | 1.82 | 0.02 |
| 1448606_at   | Edg2          | endothelial differentiation, lysophosphatidic acid G-protein-coupled receptor, 2   | 1.81 | 0.03 |
| 1448162_at   | Vcam1         | vascular cell adhesion molecule 1                                                  | 1.79 | 0.01 |
| 1420981_a_at | Lmo4          | LIM domain only 4                                                                  | 1.76 | 0.01 |
| 1421228_at   | Ccl7          | chemokine (C-C motif) ligand 7                                                     | 1.72 | 0.16 |

|              |         |                                                                                                   |      |      |
|--------------|---------|---------------------------------------------------------------------------------------------------|------|------|
| 1418240_at   | Gbp2    | guanylate nucleotide binding protein 2                                                            | 1.71 | 0.07 |
| 1419212_at   | Icosl   | icos ligand                                                                                       | 1.71 | 0.01 |
| 1416649_at   | Ambp    | alpha 1 microglobulin/bikunin                                                                     | 1.70 | 0.00 |
| 1419537_at   | Tcfec   | transcription factor EC                                                                           | 1.70 | 0.02 |
| 1421578_at   | Ccl4    | chemokine (C-C motif) ligand 4                                                                    | 1.69 | 0.11 |
| 1417143_at   | Edg2    | endothelial differentiation, lysophosphatidic acid G-protein-coupled receptor, 2                  | 1.67 | 0.04 |
| 1451458_at   | Tmem2   | transmembrane protein 2                                                                           | 1.66 | 0.06 |
| 1425686_at   | Cflar   | CASP8 and FADD-like apoptosis regulator                                                           | 1.66 | 0.01 |
| 1435133_at   | Ugcg    | UDP-glucose ceramide glucosyltransferase                                                          | 1.65 | 0.00 |
| 1421269_at   | Ugcg    | UDP-glucose ceramide glucosyltransferase                                                          | 1.61 | 0.10 |
| 1425412_at   | Nlrp3   | NLR family, pyrin domain containing 3                                                             | 1.54 | 0.03 |
| 1421487_a_at | Nck1    | non-catalytic region of tyrosine kinase adaptor protein 1                                         | 1.53 | 0.01 |
| 1422474_at   | Pde4b   | phosphodiesterase 4B, cAMP specific                                                               | 1.51 | 0.00 |
| 1418126_at   | Ccl5    | chemokine (C-C motif) ligand 5                                                                    | 1.51 | 0.58 |
| 1435906_x_at | Gbp2    | guanylate nucleotide binding protein 2                                                            | 1.50 | 0.25 |
| 1417856_at   | Relb    | avian reticuloendotheliosis viral (v-rel) oncogene related B                                      | 1.50 | 0.01 |
| 1417483_at   | Nfkbiz  | nuclear factor of kappa light polypeptide gene enhancer in B-cells inhibitor, zeta                | 1.50 | 0.11 |
| 1422473_at   | Pde4b   | phosphodiesterase 4B, cAMP specific                                                               | 1.48 | 0.02 |
| 1417496_at   | Cp      | ceruloplasmin                                                                                     | 1.48 | 0.50 |
| 1423602_at   | Traf1   | Tnf receptor-associated factor 1                                                                  | 1.47 | 0.02 |
| 1460251_at   | Fas     | Fas (TNF receptor superfamily member)                                                             | 1.46 | 0.01 |
| 1449984_at   | Cxcl2   | chemokine (C-X-C motif) ligand 2                                                                  | 1.45 | 0.01 |
| 1450769_s_at | Stard5  | StAR-related lipid transfer (START) domain containing 5                                           | 1.45 | 0.01 |
| 1449591_at   | Casp4   | caspace 4, apoptosis-related cysteine peptidase                                                   | 1.45 | 0.14 |
| 1422822_at   | Stard5  | StAR-related lipid transfer (START) domain containing 5                                           | 1.45 | 0.01 |
| 1416268_at   | Ets2    | E26 avian leukemia oncogene 2, 3' domain                                                          | 1.44 | 0.01 |
| 1424711_at   | Tmem2   | transmembrane protein 2                                                                           | 1.43 | 0.05 |
| 1420331_at   | Clec4e  | C-type lectin domain family 4, member e                                                           | 1.42 | 0.02 |
| 1421268_at   | Ugcg    | UDP-glucose ceramide glucosyltransferase                                                          | 1.41 | 0.23 |
| 1449317_at   | Cflar   | CASP8 and FADD-like apoptosis regulator                                                           | 1.40 | 0.09 |
| 1448881_at   | Hp      | haptoglobin                                                                                       | 1.39 | 0.10 |
| 1422526_at   | Acsl1   | acyl-CoA synthetase long-chain family member 1                                                    | 1.36 | 0.21 |
| 1416576_at   | Socs3   | suppressor of cytokine signaling 3                                                                | 1.34 | 0.01 |
| 1419354_at   | Klf7    | Kruppel-like factor 7 (ubiquitous)                                                                | 1.34 | 0.05 |
| 1421457_a_at | Samsn1  | SAM domain, SH3 domain and nuclear localization signals, 1                                        | 1.31 | 0.06 |
| 1450918_s_at | Src     | Rous sarcoma oncogene                                                                             | 1.30 | 0.13 |
| 1448558_a_at | Pla2g4a | phospholipase A2, group IVA (cytosolic, calcium-dependent)                                        | 1.29 | 0.06 |
| 1416572_at   | Mmp14   | matrix metalloproteinase 14 (membrane-inserted)                                                   | 1.29 | 0.58 |
| 1420330_at   | Clec4e  | C-type lectin domain family 4, member e                                                           | 1.28 | 0.02 |
| 1431843_a_at | Nfkbie  | nuclear factor of kappa light polypeptide gene enhancer in B-cells inhibitor, epsilon             | 1.25 | 0.13 |
| 1417523_at   | Plek    | pleckstrin                                                                                        | 1.25 | 0.13 |
| 1449399_a_at | Il1b    | interleukin 1 beta                                                                                | 1.25 | 0.45 |
| 1418641_at   | Lcp2    | lymphocyte cytosolic protein 2                                                                    | 1.23 | 0.15 |
| 1420591_at   | Gpr84   | G protein-coupled receptor 84                                                                     | 1.21 | 0.44 |
| 1450136_at   | Cd38    | CD38 antigen                                                                                      | 1.20 | 0.74 |
| 1419355_at   | Klf7    | Kruppel-like factor 7 (ubiquitous)                                                                | 1.19 | 0.40 |
| 1418401_a_at | Dusp16  | dual specificity phosphatase 16                                                                   | 1.18 | 0.11 |
| 1450643_s_at | Acsl1   | acyl-CoA synthetase long-chain family member 1                                                    | 1.18 | 0.35 |
| 1421065_at   | Jak2    | Janus kinase 2                                                                                    | 1.16 | 0.34 |
| 1427381_at   | Irg1    | immunoresponsive gene 1                                                                           | 1.16 | 0.64 |
| 1419254_at   | Mthfd2  | methylenetetrahydrofolate dehydrogenase (NAD+ dependent), methenyltetrahydrofolate cyclohydrolase | 1.15 | 0.73 |
| 1419665_a_at | Nupr1   | nuclear protein 1                                                                                 | 1.14 | 0.52 |

|              |               |                                                                     |       |      |
|--------------|---------------|---------------------------------------------------------------------|-------|------|
| 1437111_at   | Zc3h12c       | zinc finger CCCH type containing 12C                                | 1.12  | 0.30 |
| 1418133_at   | Bcl3          | B-cell leukemia/lymphoma 3                                          | 1.11  | 0.53 |
| 1460283_at   | Mefv          | Mediterranean fever                                                 | 1.11  | 0.59 |
| 1419666_x_at | Nupr1         | nuclear protein 1                                                   | 1.11  | 0.60 |
| 1418642_at   | Lcp2          | lymphocyte cytosolic protein 2                                      | 1.10  | 0.55 |
| 1423240_at   | Src           | Rous sarcoma oncogene                                               | 1.09  | 0.72 |
| 1449439_at   | Klf7          | Kruppel-like factor 7 (ubiquitous)                                  | 1.08  | 0.50 |
| 1450826_a_at | Saa3          | serum amyloid A 3                                                   | 1.06  | 0.90 |
| 1433741_at   | Cd38          | CD38 antigen                                                        | 1.06  | 0.91 |
| 1421066_at   | Jak2          | Janus kinase 2                                                      | 1.06  | 0.57 |
| 1455899_x_at | Socs3         | suppressor of cytokine signaling 3                                  | 1.05  | 0.79 |
| 1417256_at   | Mmp13         | matrix metalloproteinase 13                                         | 1.05  | 0.90 |
| 1448175_at   | Ehd1          | EH-domain containing 1                                              | 1.04  | 0.82 |
| 1456212_x_at | Socs3         | suppressor of cytokine signaling 3                                  | 1.04  | 0.85 |
| 1418847_at   | Arg2          | arginase type II                                                    | 1.04  | 0.87 |
| 1422953_at   | Fpr-rs2       | formyl peptide receptor, related sequence 2                         | 1.02  | 0.96 |
| 1422018_at   | Hivep2        | human immunodeficiency virus type I enhancer binding protein 2      | 1.01  | 0.93 |
| 1416012_at   | Ehd1          | EH-domain containing 1                                              | 1.01  | 0.95 |
| 1438841_s_at | Arg2          | arginase type II                                                    | -1.05 | 0.85 |
| 1416011_x_at | Ehd1          | EH-domain containing 1                                              | -1.06 | 0.67 |
| 1423017_a_at | Il1rn         | interleukin 1 receptor antagonist                                   | -1.10 | 0.81 |
| 1423289_a_at | 1810029B16Rik | RIKEN cDNA 1810029B16 gene                                          | -1.10 | 0.68 |
| 1437917_at   | D530037H12Rik | RIKEN cDNA D530037H12 gene                                          | -1.10 | 0.57 |
| 1416010_a_at | Ehd1          | EH-domain containing 1                                              | -1.12 | 0.40 |
| 1451798_at   | Il1rn         | interleukin 1 receptor antagonist                                   | -1.14 | 0.47 |
| 1419561_at   | Ccl3          | chemokine (C-C motif) ligand 3                                      | -1.16 | 0.55 |
| 1416701_at   | Rnd3          | Rho family GTPase 3                                                 | -1.22 | 0.57 |
| 1449222_at   | Ebi3          | Epstein-Barr virus induced gene 3                                   | -1.23 | 0.19 |
| 1425663_at   | Il1rn         | interleukin 1 receptor antagonist                                   | -1.23 | 0.21 |
| 1419356_at   | Klf7          | Kruppel-like factor 7 (ubiquitous)                                  | -1.25 | 0.20 |
| 1416700_at   | Rnd3          | Rho family GTPase 3                                                 | -1.26 | 0.28 |
| 1419684_at   | Ccl8          | chemokine (C-C motif) ligand 8                                      | -1.35 | 0.54 |
| 1422868_s_at | Gda           | guanine deaminase                                                   | -1.48 | 0.11 |
| 1421720_a_at | Dtx2          | deltex 2 homolog (Drosophila)                                       | -1.51 | 0.00 |
| 1427035_at   | Slc39a14      | solute carrier family 39 (zinc transporter), member 14              | -1.55 | 0.01 |
| 1423996_a_at | Il4ra         | interleukin 4 receptor, alpha                                       | -1.57 | 0.03 |
| 1450214_at   | Adora2b       | adenosine A2b receptor                                              | -1.57 | 0.01 |
| 1426600_at   | Slc2a1        | solute carrier family 2 (facilitated glucose transporter), member 1 | -1.58 | 0.02 |
| 1437992_x_at | Gja1          | gap junction membrane channel protein alpha 1                       | -1.58 | 0.06 |
| 1415800_at   | Gja1          | gap junction membrane channel protein alpha 1                       | -1.60 | 0.10 |
| 1438650_x_at | Gja1          | gap junction membrane channel protein alpha 1                       | -1.65 | 0.02 |
| 1419209_at   | Cxcl1         | chemokine (C-X-C motif) ligand 1                                    | -1.65 | 0.09 |
| 1426599_a_at | Slc2a1        | solute carrier family 2 (facilitated glucose transporter), member 1 | -1.71 | 0.00 |
| 1438945_x_at | Gja1          | gap junction membrane channel protein alpha 1                       | -1.73 | 0.05 |
| 1450808_at   | Fpr1          | formyl peptide receptor 1                                           | -1.74 | 0.21 |
| 1419410_at   | Batf          | basic leucine zipper transcription factor, ATF-like                 | -1.87 | 0.00 |
| 1425503_at   | Gcnt2         | glucosaminyl (N-acetyl) transferase 2, I-branching enzyme           | -1.89 | 0.01 |
| 1428306_at   | Ddit4         | DNA-damage-inducible transcript 4                                   | -2.12 | 0.03 |
| 1423594_a_at | Ednrb         | endothelin receptor type B                                          | -2.45 | 0.00 |
| 1428942_at   | Mt2           | metallothionein 2                                                   | -2.53 | 0.06 |
| 1416432_at   | Pfkfb3        | 6-phosphofructo-2-kinase/fructose-2,6-biphosphatase 3               | -2.68 | 0.00 |
| 1437308_s_at | F2r           | coagulation factor II (thrombin) receptor                           | -2.78 | 0.01 |
| 1452408_at   | Trex1         | three prime repair exonuclease 1                                    | -3.64 | 0.02 |
| 1460197_a_at | Steap4        | STEAP family member 4                                               | -3.99 | 0.00 |
| 1419082_at   | Serpinb2      | serine (or cysteine) peptidase inhibitor, clade B, member 2         | -4.23 | 0.00 |

FC refers to expression in *Nfkb1<sup>-/-</sup>Il10<sup>-/-</sup>* BMDM divided by expression in *Il10<sup>-/-</sup>* BMDM following stimulation with LPS in the presence of exogenous IL-10. p refers to the P-value between genotypes calculated using the Benjamini-Hochberg correction for multiple comparison testing. All listed genes were induced at least 4 fold by LPS in either *Il10<sup>-/-</sup>* or *Nfkb1<sup>-/-</sup>Il10<sup>-/-</sup>* BMDM. Duplicates, ESTs, and hypothetical genes have been removed.

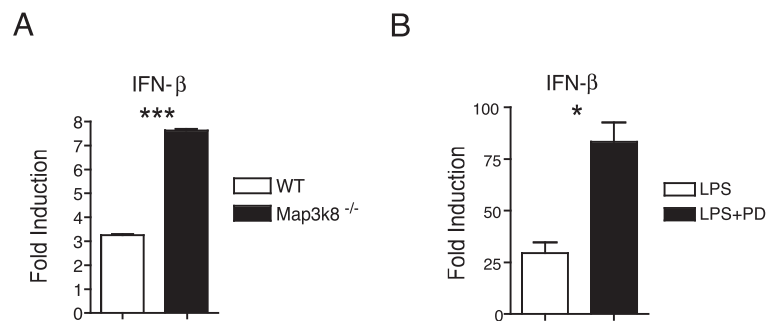

Figure S1. Increased IFN- $\beta$  expression in the absence of Tpl-2/ERK signaling. A) Fold-induction of IFN- $\beta$  mRNA in WT and *Map3k8*<sup>-/-</sup> BMDM 9 hours after stimulation with LPS (10 ng/ml). B) Fold-induction of *Ifnb1* mRNA in WT BMDM stimulated for 4h with LPS in the presence or absence of PD184352 (PD).
